# Supplementary material for: Seasonal Dynamics of the Airborne Bacterial Community and Selected Viruses in a Children’s Daycare Center
Source: PubMed Central journal article supplement (PMC4778917; doi:10.1371/journal.pone.0151004), 2016-03-04
Supplement: pone.0151004.s001.pdf [file pone.0151004.s001.pdf]

**Seasonal Dynamics of the Airborne Bacterial Community and Selected Viruses in a Children’s Daycare Center**

Aaron J. Prussin II, Amit Vikram, Kyle J. Bibby, and Linsey C. Marr

**S1 Table.** PCR cycling conditions used to detect the presence of specific viral bioaerosols throughout the year.

| <b>Virus</b>   | <b>Initial Denature (Time)</b> | <b>Denature (Time)</b> | <b>Anneal (Time)</b> | <b>Extension (Time)</b> | <b>Repeat</b> | <b>Final Extension (Time)</b> |
|----------------|--------------------------------|------------------------|----------------------|-------------------------|---------------|-------------------------------|
| Adenovirus     | 95 °C<br>(3 min)               | 95 °C<br>(60 s)        | 51 °C<br>(60 s)      | 72 °C<br>(60 s)         | 37 cycles     | 72 °C<br>(10 min)             |
| Enterovirus-71 | 95°C<br>(3 min)                | 95 °C<br>(30 s)        | 56 °C<br>(30 s)      | 72 °C<br>(60 s)         | 37 cycles     | 72 °C<br>(10 min)             |
| IAV            | 95 °C<br>(3 min)               | 95 °C<br>(30 s)        | 55 °C<br>(30 s)      | 72 °C<br>(60 s)         | 37 cycles     | 72 °C<br>(10 min)             |
| RSV            | 95 °C<br>(3 min)               | 95 °C<br>(30 s)        | 55 °C<br>(30 s)      | 72 °C<br>(60 s)         | 37 cycles     | 72 °C<br>(10 min)             |
| Rhinovirus     | 95 °C<br>(3 min)               | 95 °C<br>(30 s)        | 55 °C<br>(30 s)      | 72 °C<br>(60 s)         | 37 cycles     | 72 °C<br>(10 min)             |
| Rotavirus      | 95 °C<br>(3 min)               | 95 °C<br>(30 s)        | 48 °C<br>(30 s)      | 72 °C<br>(60 s)         | 37 cycles     | 72 °C<br>(10 min)             |
