# Supplementary material for: Seasonal Dynamics of the Airborne Bacterial Community and Selected Viruses in a Children’s Daycare Center
Source: PubMed Central journal article supplement (PMC4778917; doi:10.1371/journal.pone.0151004), 2016-03-04
Supplement: pone.0151004.s002.pdf [file pone.0151004.s002.pdf]

**Seasonal Dynamics of the Airborne Bacterial Community and Selected Viruses in a Children's Daycare Center**

Aaron J. Prussin II, Amit Vikram, Kyle J. Bibby, and Linsey C. Marr

**S2 Table.** Pairwise comparisons of UniFrac distance by season (p-values resulting from 999 permutations).

*Weighted UniFrac*

|               | <b>Winter</b> | <b>Spring</b> | <b>Summer</b> | <b>Fall</b> |
|---------------|---------------|---------------|---------------|-------------|
| <b>Winter</b> |               |               |               |             |
| <b>Spring</b> | 0.051         |               |               |             |
| <b>Summer</b> | 0.003         | 0.001         |               |             |
| <b>Fall</b>   | 0.002         | 0.001         | 0.002         |             |

*Unweighted UniFrac*

|               | <b>Winter</b> | <b>Spring</b> | <b>Summer</b> | <b>Fall</b> |
|---------------|---------------|---------------|---------------|-------------|
| <b>Winter</b> |               |               |               |             |
| <b>Spring</b> | 0.102         |               |               |             |
| <b>Summer</b> | 0.004         | 0.019         |               |             |
| <b>Fall</b>   | 0.127         | 0.062         | 0.171         |             |
